# Supplementary material
Source: ML conference proceedings conference paper supplement (https://proceedings.mlr.press/v54/naesseth17a.html)
Supplement: Supplementary file [file naesseth17a-supp.pdf]

---

# Supplementary Material

---

**Christian A. Naesseth<sup>†‡</sup>   Francisco J. R. Ruiz<sup>‡§</sup>   Scott W. Linderman<sup>‡</sup>   David M. Blei<sup>‡</sup>**  
<sup>†</sup>Linköping University   <sup>‡</sup>Columbia University   <sup>§</sup>University of Cambridge

## 1 Distribution of $\varepsilon$

Here we formalize the claim in the main manuscript regarding the distribution of the accepted variable  $\varepsilon$  in the rejection sampler. Recall that  $z = h(\varepsilon, \theta)$ ,  $\varepsilon \sim s(\varepsilon)$  is equivalent to  $z \sim r(z; \theta)$ , and that  $q(z; \theta) \leq M_\theta r(z; \theta)$ . For simplicity we consider the univariate continuous case in the exposition below, but the result also holds for the discrete and multivariate settings. The cumulative distribution function for the accepted  $\varepsilon$  is given by

$$\begin{aligned}
 \mathbb{P}(E \leq \varepsilon) &= \sum_{i=1}^{\infty} \mathbb{P}(E \leq \varepsilon, E = E_i) \\
 &= \sum_{i=1}^{\infty} \left[ \mathbb{P} \left( E_i \leq \varepsilon, U_i < \frac{q(h(E_i, \theta); \theta)}{M_\theta r(h(E_i, \theta); \theta)} \right) \right. \\
 &\quad \left. \prod_{j=1}^{i-1} \mathbb{P} \left( U_j \geq \frac{q(h(E_j, \theta); \theta)}{M_\theta r(h(E_j, \theta); \theta)} \right) \right] \\
 &= \sum_{i=1}^{\infty} \int_{-\infty}^{\varepsilon} s(e) \frac{q(h(e, \theta); \theta)}{M_\theta r(h(e, \theta); \theta)} de \prod_{j=1}^{i-1} \left( 1 - \frac{1}{M_\theta} \right) \\
 &= \int_{-\infty}^{\varepsilon} s(e) \frac{q(h(e, \theta); \theta)}{r(h(e, \theta); \theta)} de \cdot \frac{1}{M_\theta} \cdot \sum_{i=1}^{\infty} \left( 1 - \frac{1}{M_\theta} \right)^{i-1} \\
 &= \int_{-\infty}^{\varepsilon} s(e) \frac{q(h(e, \theta); \theta)}{r(h(e, \theta); \theta)} de.
 \end{aligned}$$

Here, we have applied that  $z = h(\varepsilon, \theta)$ ,  $\varepsilon \sim s(\varepsilon)$  is a reparameterization of  $z \sim r(z; \theta)$ , and thus

$$\begin{aligned}
 &\mathbb{P} \left( U_j \geq \frac{q(h(E_j, \theta); \theta)}{M_\theta r(h(E_j, \theta); \theta)} \right) \\
 &= \int_{-\infty}^{\infty} s(e) \left( 1 - \frac{q(h(e, \theta); \theta)}{M_\theta r(h(e, \theta); \theta)} \right) de \\
 &= 1 - \frac{1}{M_\theta} \mathbb{E}_{s(e)} \left[ \frac{q(h(e, \theta); \theta)}{r(h(e, \theta); \theta)} \right] \\
 &= 1 - \frac{1}{M_\theta} \mathbb{E}_{r(z; \theta)} \left[ \frac{q(z; \theta)}{r(z; \theta)} \right] = 1 - \frac{1}{M_\theta}.
 \end{aligned}$$

The density is obtained by taking the derivative of the

cumulative distribution function with respect to  $\varepsilon$ ,

$$\frac{d}{d\varepsilon} \mathbb{P}(E \leq \varepsilon) = s(\varepsilon) \frac{q(h(\varepsilon, \theta); \theta)}{r(h(\varepsilon, \theta); \theta)},$$

which is the expression from the main manuscript.

The motivation from the main manuscript is basically a standard “area-under-the-curve” or geometric argument for rejection sampling [Robert and Casella, 2004], but for  $\varepsilon$  instead of  $z$ .

## 2 Derivation of the Gradient

We provide below details for the derivation of the gradient. We assume that  $h$  is differentiable (almost everywhere) with respect to  $\theta$ , and that  $f(h(\varepsilon, \theta)) \frac{q(h(\varepsilon, \theta); \theta)}{r(h(\varepsilon, \theta); \theta)}$  is continuous in  $\theta$  for all  $\varepsilon$ . Then, we have

$$\begin{aligned}
 \nabla_\theta \mathbb{E}_{q(z; \theta)}[f(z)] &= \nabla_\theta \mathbb{E}_{\pi(\varepsilon; \theta)}[f(h(\varepsilon, \theta))] \\
 &= \int s(\varepsilon) \nabla_\theta \left( f(h(\varepsilon, \theta)) \frac{q(h(\varepsilon, \theta); \theta)}{r(h(\varepsilon, \theta); \theta)} \right) d\varepsilon \\
 &= \int s(\varepsilon) \frac{q(h(\varepsilon, \theta); \theta)}{r(h(\varepsilon, \theta); \theta)} \nabla_\theta f(h(\varepsilon, \theta)) d\varepsilon \\
 &\quad + \int s(\varepsilon) f(h(\varepsilon, \theta)) \nabla_\theta \left( \frac{q(h(\varepsilon, \theta); \theta)}{r(h(\varepsilon, \theta); \theta)} \right) d\varepsilon \\
 &= \underbrace{\mathbb{E}_{\pi(\varepsilon; \theta)}[\nabla_\theta f(h(\varepsilon, \theta))]}_{=: g_{\text{rep}}} + \\
 &\quad + \underbrace{\mathbb{E}_{\pi(\varepsilon; \theta)} \left[ f(h(\varepsilon, \theta)) \nabla_\theta \log \frac{q(h(\varepsilon, \theta); \theta)}{r(h(\varepsilon, \theta); \theta)} \right]}_{=: g_{\text{cor}}},
 \end{aligned}$$

where in the last step we have identified  $\pi(\varepsilon; \theta)$  and made use of the log-derivative trick

$$\nabla_\theta \frac{q(h(\varepsilon, \theta); \theta)}{r(h(\varepsilon, \theta); \theta)} = \frac{q(h(\varepsilon, \theta); \theta)}{r(h(\varepsilon, \theta); \theta)} \nabla_\theta \log \frac{q(h(\varepsilon, \theta); \theta)}{r(h(\varepsilon, \theta); \theta)}.$$

**Gradient of Log-Ratio in  $g_{\text{cor}}$**  For invertible reparameterizations we can simplify the evaluation of the gradient of the log-ratio in  $g_{\text{cor}}$  as follows using stan-

standard results on transformation of a random variable

$$\begin{aligned} \nabla_{\theta} \log \frac{q(h(\varepsilon, \theta); \theta)}{r(h(\varepsilon, \theta); \theta)} &= \nabla_{\theta} \log q(h(\varepsilon, \theta); \theta) + \\ &+ \nabla_{\theta} \log \left| \frac{dh}{d\varepsilon}(\varepsilon, \theta) \right| - \nabla_{\theta} \log \underbrace{s(h^{-1}(h(\varepsilon, \theta), \theta))}_{= s(\varepsilon)} \\ &= \nabla_{\theta} \log q(h(\varepsilon, \theta); \theta) + \nabla_{\theta} \log \left| \frac{dh}{d\varepsilon}(\varepsilon, \theta) \right|. \end{aligned}$$

### 3 Examples of Reparameterizable Rejection Samplers

We show in Table 1 some examples of reparameterizable rejection samplers for three distributions, namely, the gamma, the truncated normal, and the von Misses distributions (for more examples, see Devroye [1986]). We show the distribution  $q(z; \theta)$ , the transformation  $h(\varepsilon, \theta)$ , and the proposal  $s(\varepsilon)$  used in the rejection sampler.

We show in Table 2 six examples of distributions that can be reparameterized in terms of auxiliary gamma-distributed random variables. We show the distribution  $q(z; \theta)$ , the distribution of the auxiliary gamma random variables  $p(\tilde{z}; \theta)$ , and the mapping  $z = g(\tilde{z}, \theta)$ .

### 4 Reparameterizing the Gamma Distribution

We provide details on reparameterization of the gamma distribution. In the following we consider rate  $\beta = 1$ . Note that this is not a restriction, we can always reparameterize the rate. The density of the gamma random variable is given by

$$q(z; \alpha) = \frac{z^{\alpha-1} e^{-z}}{\Gamma(\alpha)},$$

where  $\Gamma(\alpha)$  is the gamma function. We make use of the reparameterization defined by

$$\begin{aligned} z &= h(\varepsilon, \alpha) = \left( \alpha - \frac{1}{3} \right) \left( 1 + \frac{\varepsilon}{\sqrt{9\alpha - 3}} \right)^3, \\ \varepsilon &\sim \mathcal{N}(0, 1). \end{aligned}$$

Because  $h$  is invertible we can make use of the simplified gradient of the log-ratio derived in Section 2

above. The gradients of  $\log q$  and  $-\log r$  are given by

$$\begin{aligned} \nabla_{\alpha} \log q(h(\varepsilon, \alpha); \alpha) &= \log(h(\varepsilon, \alpha)) + (\alpha - 1) \frac{\frac{dh(\varepsilon, \alpha)}{d\alpha}}{h(\varepsilon, \alpha)} - \frac{dh(\varepsilon, \alpha)}{d\alpha} - \psi(\alpha), \\ \nabla_{\alpha} -\log r(h(\varepsilon, \alpha); \alpha) &= \nabla_{\alpha} \log \left| \frac{dh}{d\varepsilon}(\varepsilon, \alpha) \right| \\ &= \frac{1}{2\left(\alpha - \frac{1}{3}\right)} - \frac{9\varepsilon}{\left(1 + \frac{\varepsilon}{\sqrt{9\alpha - 3}}\right) (9\alpha - 3)^{\frac{3}{2}}}, \end{aligned}$$

where  $\psi(\alpha)$  is the digamma function and

$$\begin{aligned} \frac{dh(\varepsilon, \alpha)}{d\alpha} &= \left( 1 + \frac{\varepsilon}{\sqrt{9\alpha - 3}} \right)^3 - \frac{27\varepsilon}{2(9\alpha - 3)^{\frac{3}{2}}} \left( 1 + \frac{\varepsilon}{\sqrt{9\alpha - 3}} \right)^2. \end{aligned}$$

### References

- L. Devroye. *Non-Uniform Random Variate Generation*. Springer-Verlag, 1986.
- C. Robert and G. Casella. *Monte Carlo statistical methods*. Springer Science & Business Media, 2004.

| $q(z; \theta)$                           | $h(\varepsilon, \theta)$                                                                                                                                                                                  | $s(\varepsilon)$                      |
|------------------------------------------|-----------------------------------------------------------------------------------------------------------------------------------------------------------------------------------------------------------|---------------------------------------|
| Gamma( $\alpha, 1$ )                     | $(\alpha - \frac{1}{3}) \left(1 + \frac{\varepsilon}{\sqrt{9\alpha-3}}\right)^3$                                                                                                                          | $\varepsilon \sim \mathcal{N}(0, 1)$  |
| Truncated $\mathcal{N}(0, 1, a, \infty)$ | $\sqrt{a^2 - 2 \log \varepsilon}$                                                                                                                                                                         | $\varepsilon \sim \mathcal{U}[0, 1]$  |
| vonMises( $\kappa$ )                     | $\frac{\text{sign}(\varepsilon)}{\cos(\frac{1+c \cos(\pi \varepsilon)}{c+\cos(\pi \varepsilon)})}$ , $c = \frac{1+\rho^2}{2\rho}$ , $\rho = \frac{r-\sqrt{2r}}{2\kappa}$ , $r = 1 + \sqrt{1 + 4\kappa^2}$ | $\varepsilon \sim \mathcal{U}[-1, 1]$ |

Table 1: Examples of reparameterizable rejection samplers; many more can be found in Devroye [1986]. The first column is the distribution, the second column is the transformation  $h(\varepsilon, \theta)$ , and the last column is the proposal  $s(\varepsilon)$ .

| $q(z; \theta)$              | $g(\tilde{z}, \theta)$                                                            | $p(\tilde{z}; \theta)$                                                                 |
|-----------------------------|-----------------------------------------------------------------------------------|----------------------------------------------------------------------------------------|
| Beta( $\alpha, \beta$ )     | $\frac{\tilde{z}_1}{\tilde{z}_1 + \tilde{z}_2}$                                   | $\tilde{z}_1 \sim \text{Gamma}(\alpha, 1)$ , $\tilde{z}_2 \sim \text{Gamma}(\beta, 1)$ |
| Dirichlet( $\alpha_{1:K}$ ) | $\frac{1}{\sum_{\ell} \tilde{z}_{\ell}} (\tilde{z}_1, \dots, \tilde{z}_K)^{\top}$ | $\tilde{z}_k \sim \text{Gamma}(\alpha_k, 1)$ , $k = 1, \dots, K$                       |
| St( $\nu$ )                 | $\sqrt{\frac{\nu}{2\tilde{z}_1}} \tilde{z}_2$                                     | $\tilde{z}_1 \sim \text{Gamma}(\nu/2, 1)$ , $\tilde{z}_2 \sim \mathcal{N}(0, 1)$       |
| $\chi^2(k)$                 | $2\tilde{z}$                                                                      | $\tilde{z} \sim \text{Gamma}(k/2, 1)$                                                  |
| F( $d_1, d_2$ )             | $\frac{d_2 \tilde{z}_1}{d_1 \tilde{z}_2}$                                         | $\tilde{z}_1 \sim \text{Gamma}(d_1/2, 1)$ , $\tilde{z}_2 \sim \text{Gamma}(d_2/2, 1)$  |
| Nakagami( $m, \Omega$ )     | $\sqrt{\frac{\Omega \tilde{z}}{m}}$                                               | $\tilde{z} \sim \text{Gamma}(m, 1)$                                                    |

Table 2: Examples of random variables as functions of auxiliary random variables with reparameterizable distributions. The first column is the distribution, the second column is a function  $g(\tilde{z}, \theta)$  mapping from the auxiliary variables to the desired variable, and the last column is the distribution of the auxiliary variables  $\tilde{z}$ .
